# Supplementary material for: Photosalient [2 + 2] photodimerization in metal chloride-templated organic crystals
Source: Royal Society of Chemistry journal article supplement (doi:10.1039/d5ce00203f), 2025-01-01
Supplement: d5ce00203f1.pdf [file d5ce00203f1.pdf]

Supplementary Information

## Photosalient [2+2] Photodimerization in Metal Chloride-Templated Organic Crystals

Sotaro Kusumoto,<sup>\*a</sup> Kippei Usuda,<sup>a</sup> Kenta Rakumitsu,<sup>b</sup> Yang Kim,<sup>c</sup> Yoshihiro Koide<sup>\*a</sup>

<sup>a</sup> *Department of Applied Chemistry, Faculty of Chemistry and Biochemistry, Kanagawa University, 3-27-1 Rokkakubashi, Kanagawa-ku, Yokohama 221-8686, Japan.*

<sup>b</sup> *Graduate School of Pharmaceutical Sciences, Chiba University, 1-8-1 Inohana, Chuo-ku, Chiba 260-8675, Japan.*

<sup>c</sup> *Department of Chemistry, Graduate School of Science and Technology, Kumamoto University, 2-39-1 Kurokami, Chuo-ku, Kumamoto 860-8555, Japan.*

Corresponding author: S. Kusumoto  
E-mail: [kusumoto@kanagawa-u.ac.jp](mailto:kusumoto@kanagawa-u.ac.jp)

## Experimental

### Materials and Instruments.

All chemicals and solvents used in the preparation were obtained from Tokyo Kasei Co. and Wako Pure Chemical Industries, Ltd. and were used without further purification.

### Preparation of Ebpe\_In, Ebpe\_Bi, Ebpe\_Sb, Ebpe\_Sn and Ebpe\_In\_UV

#### Ebpe\_In

1,2-Di(4-pyridyl)ethylene (0.018 g, 0.1 mmol) and indium oxide (0.056g, 0.2 mmol) were placed in separate 100 mL beakers, each containing 20 mL of 12 M hydrochloric acid. The mixtures were heated and stirred at 100 °C until dissolved. The solutions were then combined in a 100 mL beaker and stirred for an additional 20 minutes. After standing for one week, the resulting colorless crystal was collected by suction filtration. (yield: 48%, 0.027 g). Calcd for  $[\text{H}_2\text{Ebpe}][\text{InCl}_5(\text{H}_2\text{O})] \cdot 3\text{H}_2\text{O}$ , C, 26.28; H, 3.68; N, 5.11. Found C, 26.2; H, 2.90; N, 4.58%.

#### Ebpe\_Bi

Replacing the metal source with bismuth oxide ( $\text{Bi}_2\text{O}_3$ ) and following the same procedure as for Ebpe\_In, colorless crystals were obtained. (0.021 g, yield: 19%). Calcd for  $[\text{H}_2\text{Ebpe}]_2[\text{Bi}_2\text{Cl}_{10}]$  C, 25.27; H, 2.12; N, 4.91. Found C, 25.06; H, 2.19; N, 4.43%.

#### Ebpe\_Sb

Replacing the metal source with antimony oxide ( $\text{Sb}_2\text{O}_3$ ) and following the same procedure as for Ebpe\_In, yellow crystals were obtained. (0.03 g, yield: 57%). Calcd for  $[\text{H}_2\text{Ebpe}][\text{SbCl}_5]$  C, 29.83; H, 2.50; N, 5.80. Found C, 29.52; H, 2.60; N, 5.42%.

#### Ebpe\_Sn

Replacing the metal source with tin(II) chloride ( $\text{SnCl}_2$ ) and following the same procedure as for Ebpe\_In, colorless crystals were obtained. (0.033 g, yield: 61%). Calcd for  $[\text{H}_2\text{Ebpe}][\text{SbCl}_5]$  C, 27.95; H, 2.35; N, 5.43. Found C, 27.47; H, 2.41; N, 4.92%.

#### Ebpe\_In\_UV

After UV irradiation (25 mW/cm<sup>2</sup>) of **Ebpe\_In** powder for 3 hours, the sample was dissolved in 20 mL of water, followed by the addition of a drop of 12 M hydrochloric acid. After standing for one month, transparent block-shaped crystals were obtained. Due to the limited amount of crystals obtained, no further characterization beyond single-crystal X-ray analysis was performed.

**Physical measurements**

Single-crystal X-ray diffraction data were collected using an XtaLAB Synergy instrument. The structures were determined through direct methods with SHELXT<sup>1</sup> and refined using the SHELXL program, employing full-matrix least-squares refinement.<sup>2</sup> Hydrogen atoms were refined geometrically with a riding model. Detailed crystallographic data are summarized in Table S1. Elemental analyses were conducted using an Elementar Vario Micro Cube analyzer. PXRD data were obtained on a RIGAKU RINT-Ultima III X-ray diffractometer (40 kV/40 mA) using Cu K $\alpha$  radiation ( $\lambda = 1.5406 \text{ \AA}$ ) across a  $2\theta$  range of  $2\text{--}30^\circ$ , with a step width of  $1.0^\circ$ .

## Supplementary data

Table S1. Crystallographic data.

| Compound                                            | Ebpe_In                                                                          | Ebpe_Bi                                                                         | Ebpe_Sb                                                                                | Ebpe_Sn                                                           | Ebpe_In_UV                                                                       |
|-----------------------------------------------------|----------------------------------------------------------------------------------|---------------------------------------------------------------------------------|----------------------------------------------------------------------------------------|-------------------------------------------------------------------|----------------------------------------------------------------------------------|
| formula                                             | C <sub>12</sub> H <sub>16</sub> Cl <sub>5</sub> In N <sub>2</sub> O <sub>2</sub> | C <sub>24</sub> H <sub>24</sub> Bi <sub>2</sub> Cl <sub>10</sub> N <sub>4</sub> | C <sub>96</sub> H <sub>100</sub> Cl <sub>40</sub> N <sub>16</sub> O<br>Sb <sub>8</sub> | C <sub>12</sub> H <sub>12</sub> Cl <sub>6</sub> N <sub>2</sub> Sn | C <sub>24</sub> H <sub>32</sub> Cl <sub>7</sub> In N <sub>4</sub> O <sub>4</sub> |
| formula weight                                      | 512.354                                                                          | 1140.971                                                                        | 3886.151                                                                               | 515.668                                                           | 803.532                                                                          |
| crystal system                                      | monoclinic                                                                       | monoclinic                                                                      | orthorhombic                                                                           | monoclinic                                                        | tetragonal                                                                       |
| space group                                         | <i>C2/c</i>                                                                      | <i>C2/c</i>                                                                     | <i>C222<sub>1</sub></i>                                                                | <i>I2/a</i>                                                       | <i>P 4/n</i>                                                                     |
| <i>a</i> / Å                                        | 18.6884(5)                                                                       | 18.4183(11)                                                                     | 11.2944(5)                                                                             | 7.1093(3)                                                         | 13.3333(5)                                                                       |
| <i>b</i> / Å                                        | 13.4365(4)                                                                       | 12.9016(8)                                                                      | 37.3407(14)                                                                            | 14.9953(5)                                                        | 13.3333(5)                                                                       |
| <i>c</i> / Å                                        | 14.1149(4)                                                                       | 13.7365(9)                                                                      | 15.8762(7)                                                                             | 32.2219(13)                                                       | 8.8676(6)                                                                        |
| $\alpha$ / °                                        | 90                                                                               | 90                                                                              | 90                                                                                     | 90                                                                | 90                                                                               |
| $\beta$ / °                                         | 95.665(3)                                                                        | 93.937(5)                                                                       | 90                                                                                     | 91.529(3)                                                         | 90                                                                               |
| $\gamma$ / °                                        | 90                                                                               | 90                                                                              | 90                                                                                     | 90                                                                | 90                                                                               |
| <i>V</i> / Å <sup>3</sup>                           | 3527.04(17)                                                                      | 3256.4(4)                                                                       | 6695.6(5)                                                                              | 3433.8(2)                                                         | 1576.45(14)                                                                      |
| <i>Z</i>                                            | 8                                                                                | 4                                                                               | 2                                                                                      | 8                                                                 | 2                                                                                |
| <i>T</i> / K                                        | 120                                                                              | 120                                                                             | 120                                                                                    | 120                                                               | 120                                                                              |
| <i>R</i> <sub>1</sub> [ <i>I</i> > 2σ( <i>I</i> )]  | 0.0169                                                                           | 0.0210                                                                          | 0.0204                                                                                 | 0.0357                                                            | 0.0268                                                                           |
| <i>wR</i> <sub>2</sub> [ <i>I</i> > 2σ( <i>I</i> )] | 0.0412                                                                           | 0.0503                                                                          | 0.0486                                                                                 | 0.0656                                                            | 0.0736                                                                           |
| <i>R</i> <sub>1</sub> (all data)                    | 0.0183                                                                           | 0.0234                                                                          | 0.0212                                                                                 | 0.0459                                                            | 0.0283                                                                           |
| <i>wR</i> <sub>2</sub> (all data)                   | 0.0418                                                                           | 0.0512                                                                          | 0.0490                                                                                 | 0.0679                                                            | 0.0743                                                                           |
| G.O.F.                                              | 1.0446                                                                           | 1.0455                                                                          | 1.0347                                                                                 | 1.0602                                                            | 1.0207                                                                           |
| CCDC                                                | 2425108                                                                          | 2425110                                                                         | 2425111                                                                                | 2425112                                                           | 2425113                                                                          |

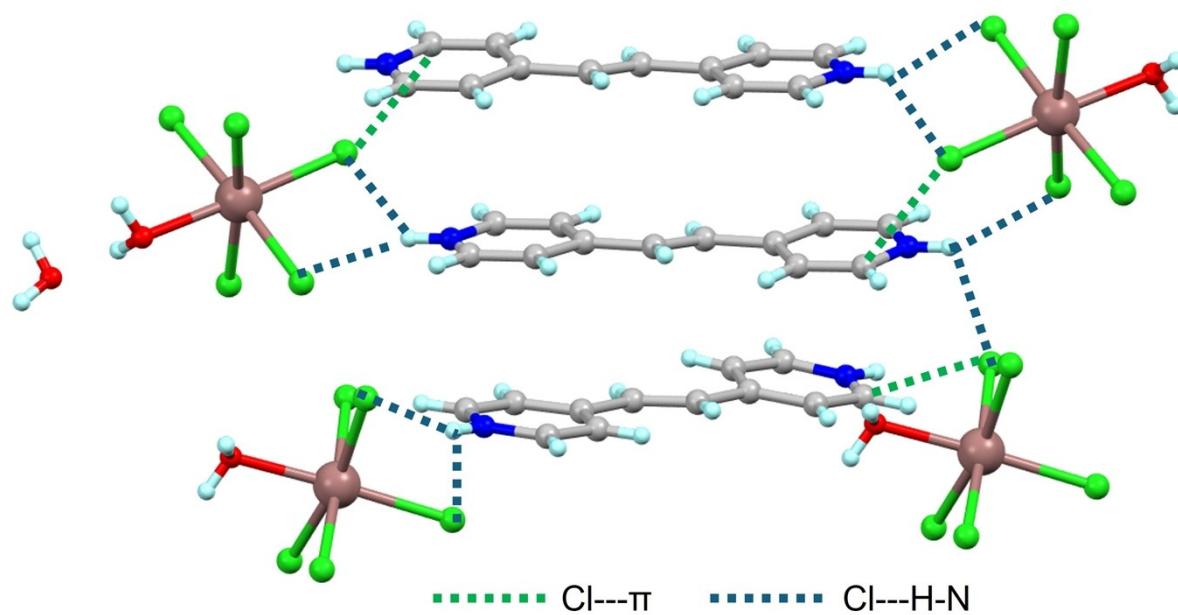

**Fig. S1** Intermolecular interactions around  $[\text{H}_2\text{Ebpe}]^{2+}$  in **Ebpe\_In**.

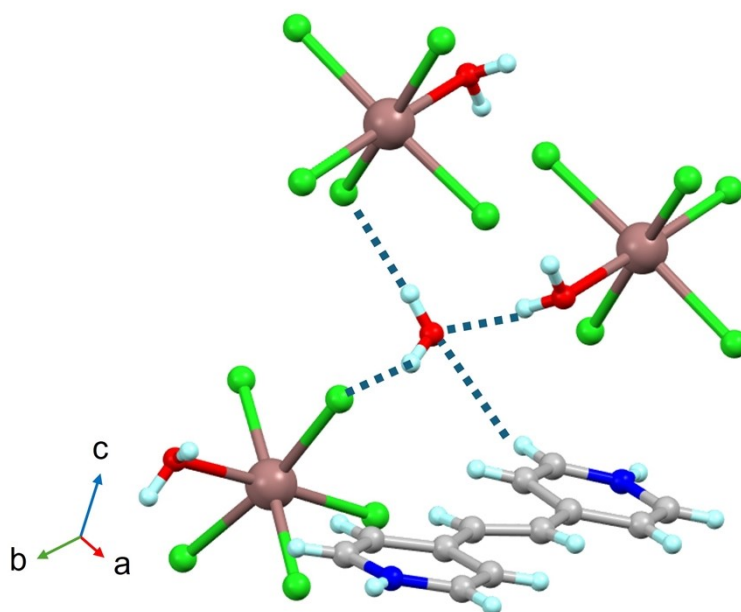

**Fig. S2 (a)** Intermolecular interactions around a water molecule.

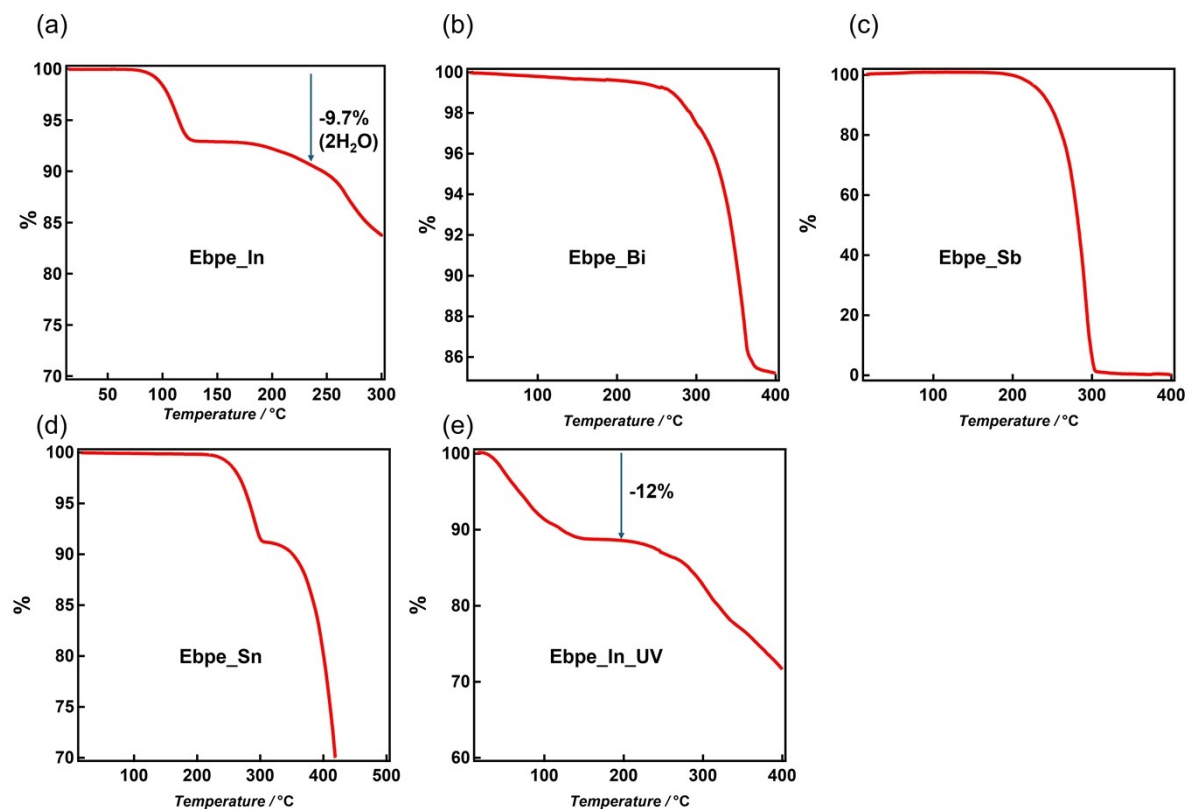

**Fig. S3** (a) Thermogravimetric analysis (TGA) of **Ebpe** shows a 9.7% weight loss, corresponding to two water molecules, as confirmed by single-crystal structural analysis. (b–d) TGA profiles for **Ebpe\_Bi**, **Ebpe\_Sb**, and **Ebpe\_Sn**, respectively. (e) TGA results for **Ebpe\_In\_UV** indicate a 12% weight loss attributed to five water molecules believed to be adsorbed from ambient moisture.

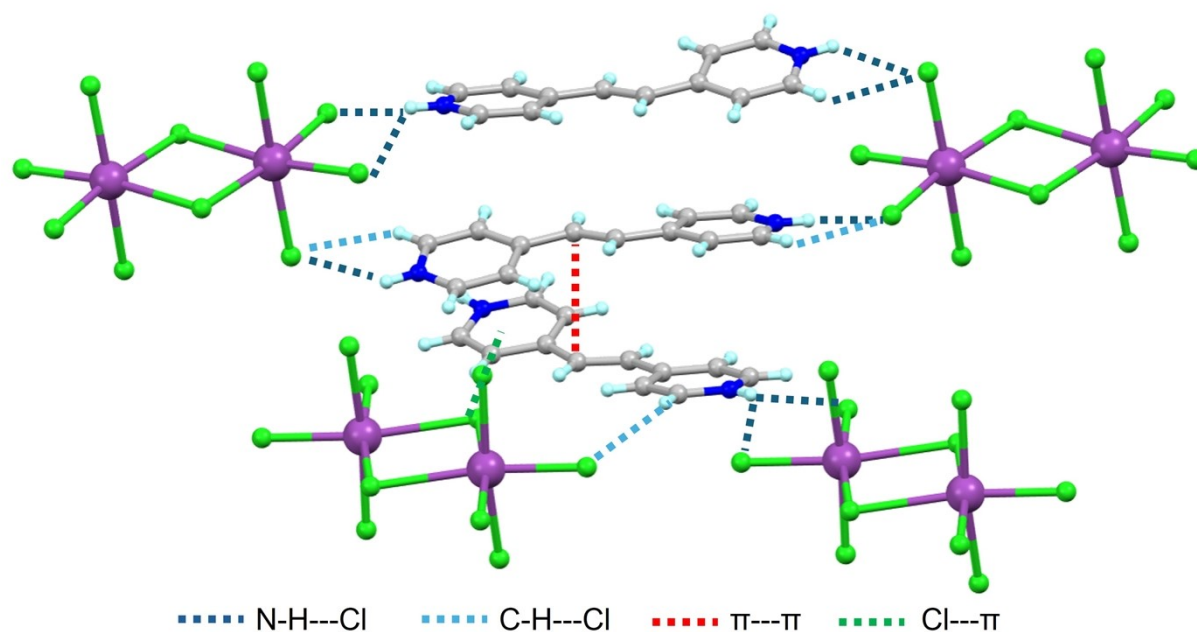

**Fig. S4** Intermolecular interactions around  $[\text{H}_2\text{Ebpe}]^{2+}$  in **Ebpe\_Bi**.

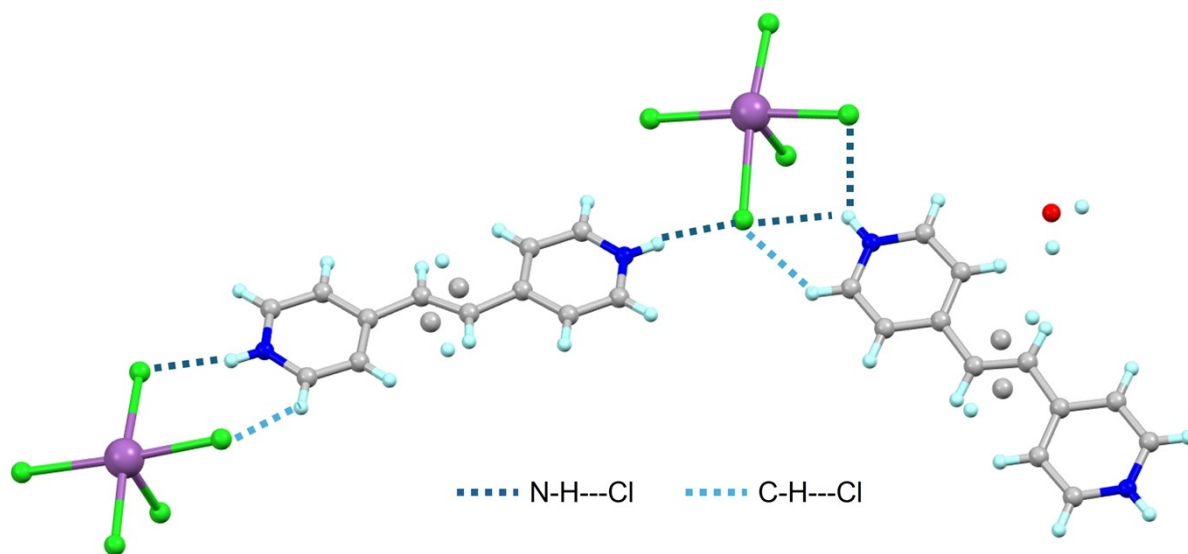

**Fig. S5** Intermolecular interactions around  $[H_2Ebpe]^{2+}$  in  $Ebpe\_Sb$ .

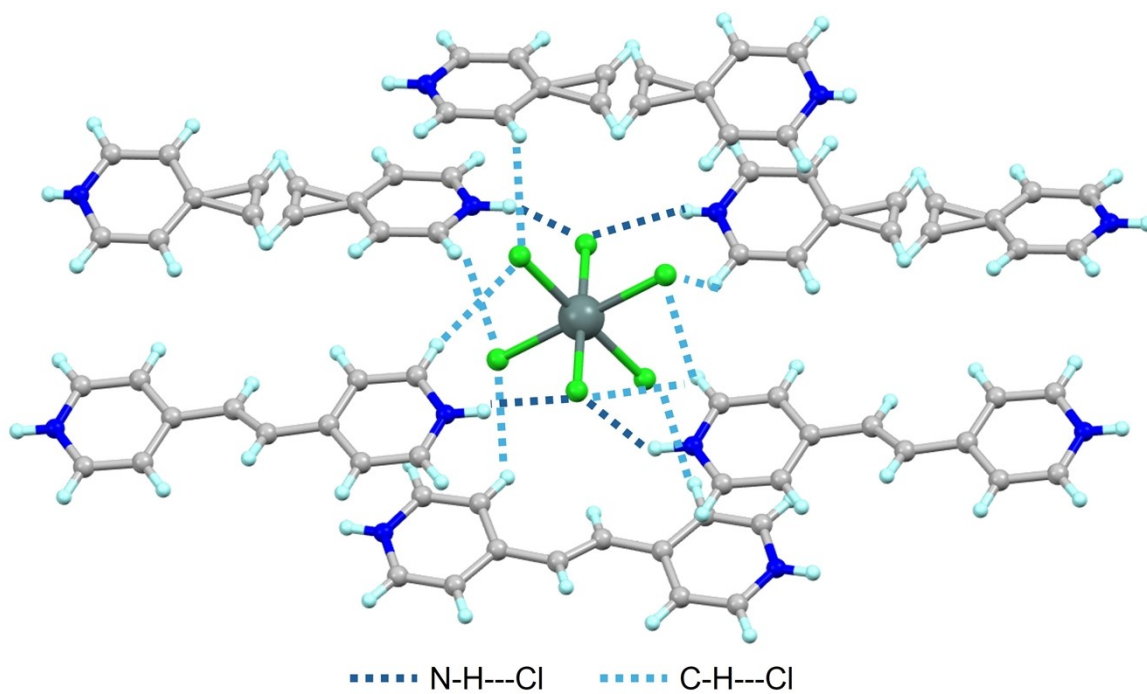

**Fig. S6** Intermolecular interactions around  $[SnCl_6]^{2-}$  in  $Ebpe\_Sn$ .

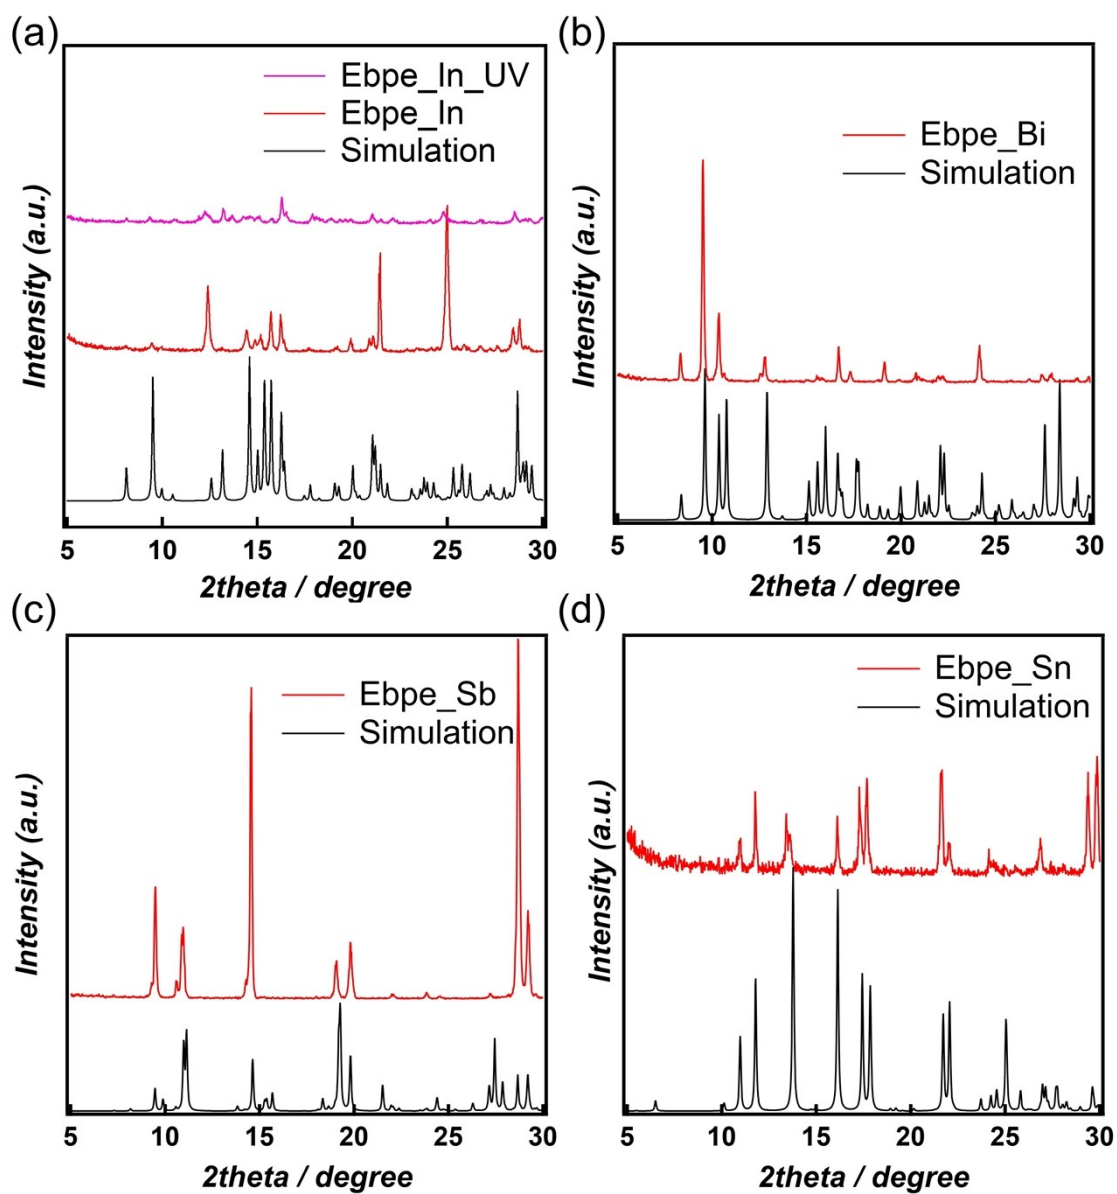

**Fig. S7** Experimental and simulated PXRD patterns of **Ebpe\_In** (a), **Ebpe\_Bi** (b), **Ebpe\_Sb** (c), and **Ebpe\_Sn** (d).



**Fig. S8** Time-dependent  $^1\text{H}$  NMR spectra with integration values of **Ebpe\_In** crystalline powder irradiated with UV light for 0, 20, 30, 60, 120, 180, and 1440 minutes (measured in  $\text{D}_2\text{O}$ ).

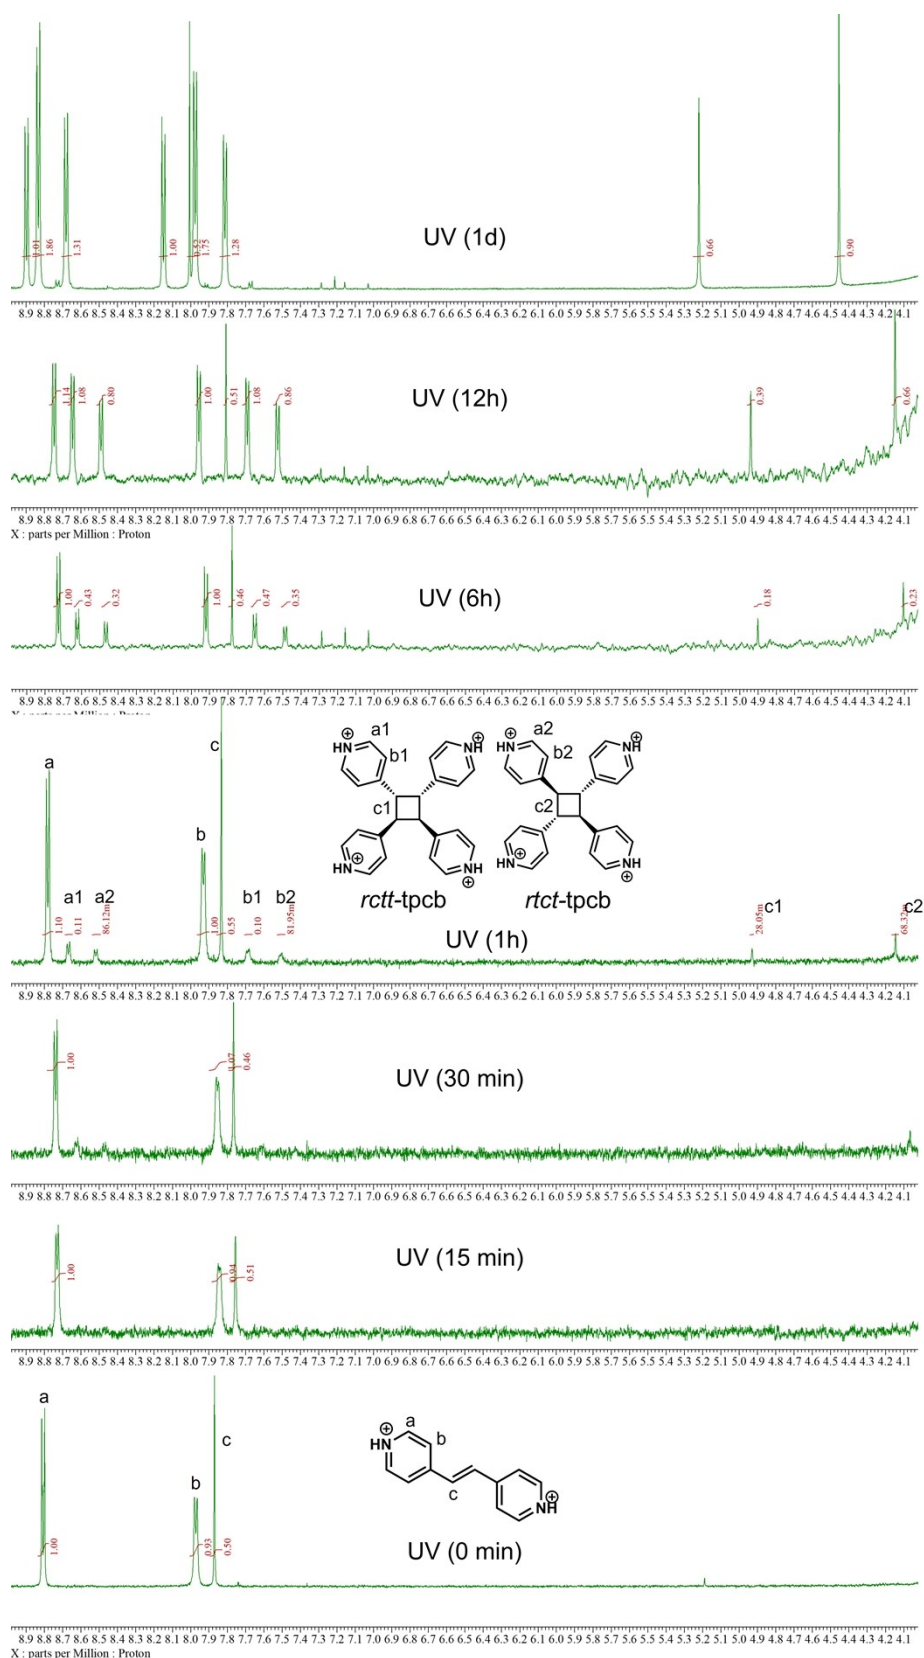

**Fig. S9** Time-dependent  $^1\text{H}$  NMR spectra with integration values of **Ebpe\_In** crystalline powder irradiated with UV light for 0, 15, 30, 60, 360, 720, and 1440 minutes (measured in  $\text{DMSO-d}_6$ ).

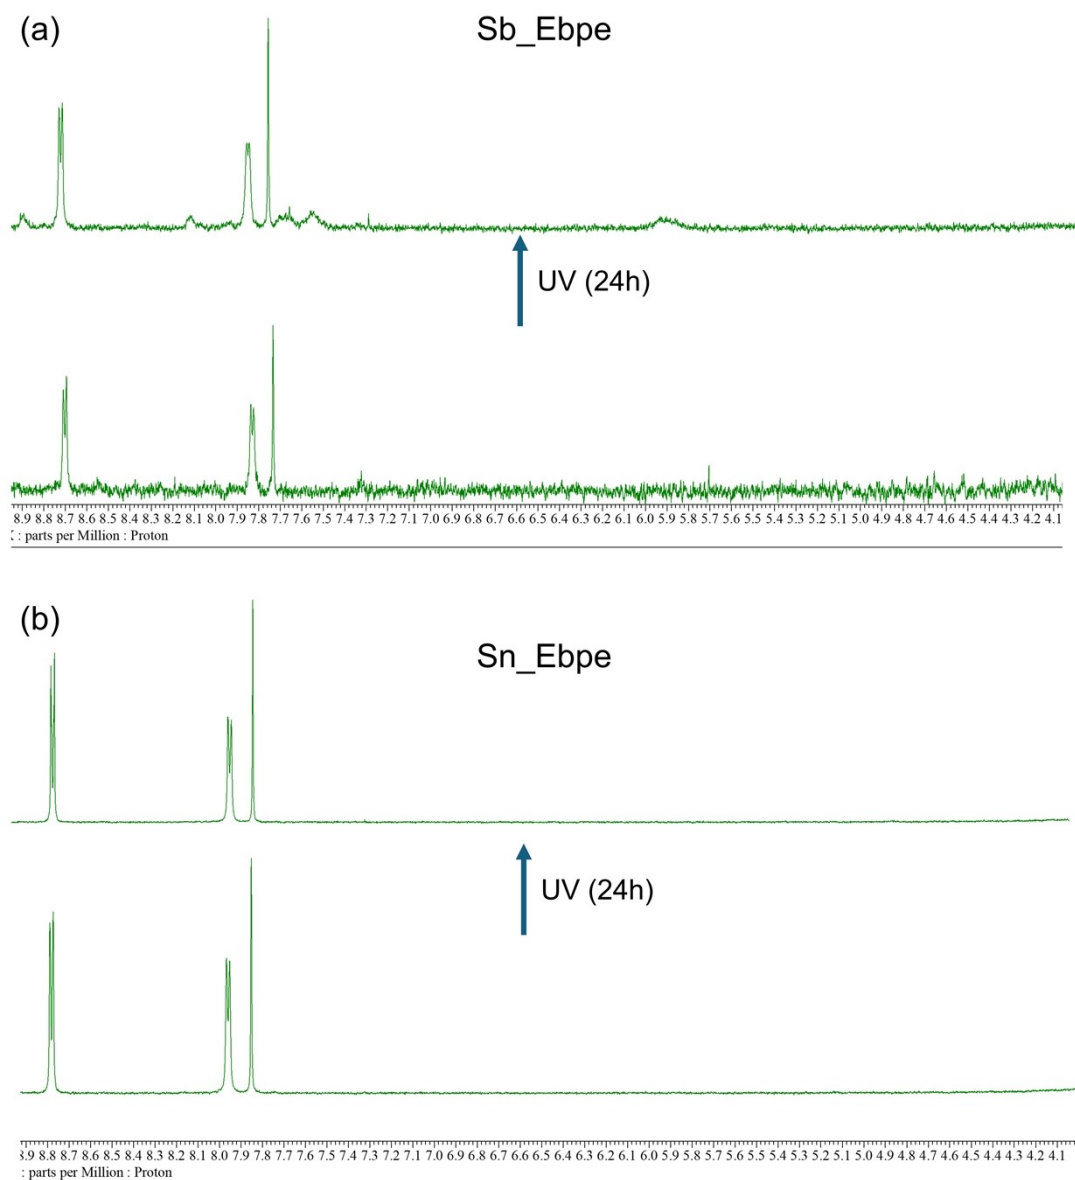

**Fig. S10**  $^1\text{H}$  NMR spectra of **Sb\_Ebpe** (a) and **Sn\_Ebpe** (b) before and after UV irradiation (24 h) (measured in  $\text{DMSO-d}_6$ ).

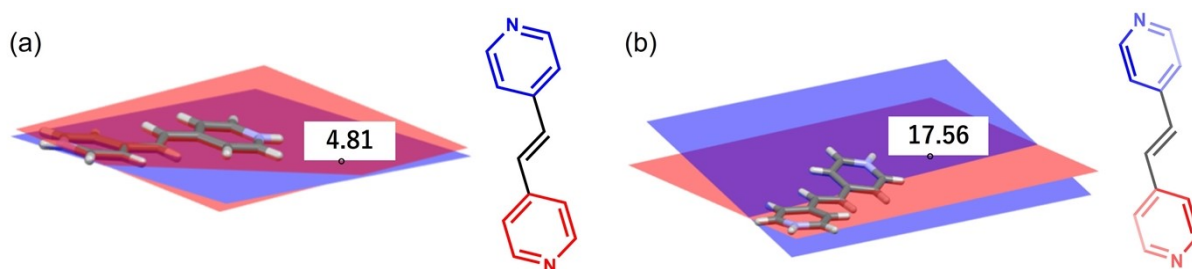

**Fig. S11** Dihedral angle between pyridine rings in (a) **Ebpe\_In** and (b) **Ebpe\_Bi**.

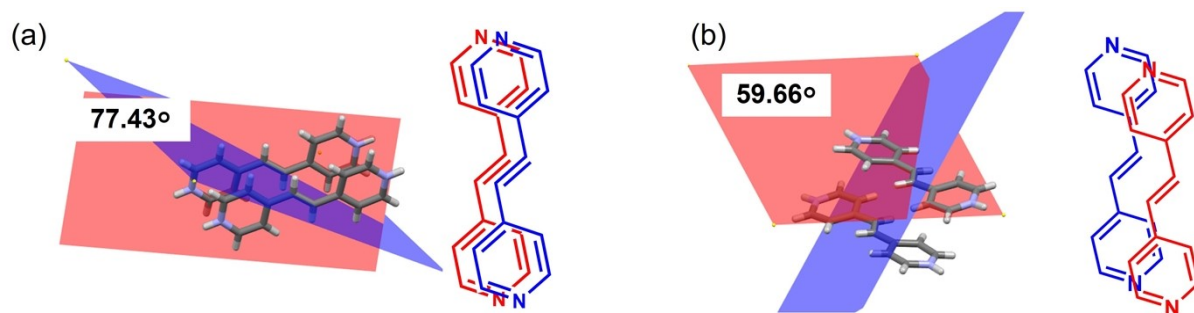

**Fig. S12** Dihedral angle between the plane containing C=C-C-C and the plane containing the C=C bonds of two molecules in **Ebpe\_In** (a) and **Ebpe\_Bi** (b).

## References

1. G. M. Sheldrick, *Acta Crystallogr, Sect. A* 2015, 71, 3–8.
2. G. M. Sheldrick, *Acta Crystallogr Sect. C* 2015, 71, 3–8.
